# Supplementary material for: Growth, Gastrointestinal Tolerance and Stool Characteristics of Healthy Term Infants Fed an Infant Formula Containing Hydrolyzed Whey Protein (63%) and Intact Casein (37%): A Randomized Clinical Trial
Source: MDPI journal article supplement (doi:10.3390/nu9111254), 2017-11-16
Supplement: s1 [file s1]

# Supplementary materials:

**Table S1.** Molecular weight distribution in HWP-F

| Molecular weight range, Da | HWP-F, % |
|----------------------------|----------|
| <180                       | 3.69     |
| 180~500                    | 5.55     |
| 500~1,000                  | 3.85     |
| 1,000~2,000                | 6.49     |
| 2,000~3,000                | 4.03     |
| 3,000~5,000                | 3.84     |
| 5,000~10,000               | 5.46     |
| >10,000                    | 67.09    |

HWP-F, Infant formula containing hydrolyzed whey protein.

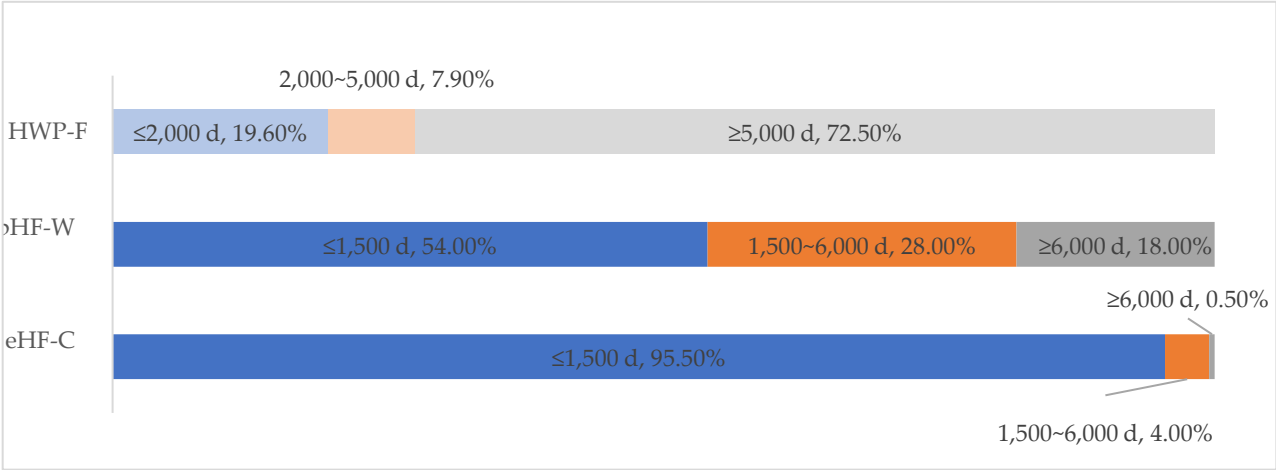

**Figure S1.** Comparison of Molecular weight distribution between HWP-F and commercial pHF-W and eHF-C. HWP-F, Infant formula containing hydrolyzed whey protein. pHF-W and eHF-C are well-established products [1].

**Table S2.** Weight, length, head circumference, and BMI and their z-scores at baseline, and 7 and 13 weeks of age of breast-, IWP-F-, and HWP-F-fed term infants (Per protocol analyzed).

|                                    | Baseline   |            |            | $p^3$ | 7wk       |            |            | $p^3$ | 13wk       |            |            | $p^3$ | $p^4$ |
|------------------------------------|------------|------------|------------|-------|-----------|------------|------------|-------|------------|------------|------------|-------|-------|
|                                    | BF         | IWP-F      | HWP-F      |       | BF        | IWP-F      | HWP-F      |       | BF         | IWP-F      | HWP-F      |       |       |
| Absolute values <sup>1</sup>       |            |            |            |       |           |            |            |       |            |            |            |       |       |
| Weight, kg                         | 3.6±0.5    | 3.5±0.4    | 3.6±0.5    | 0.707 | 5.3±0.5   | 5.3±0.6    | 5.2±0.7    | 0.763 | 6.5±0.7    | 6.5±0.6    | 6.5±0.8    | 0.926 | 0.475 |
| Crown-heel Length, cm              | 51.3±2.1   | 51.3±2.0   | 51.7±2.4   | 0.505 | 57.4±2.1  | 57.5±2.2   | 57.6±2.4   | 0.894 | 61.5±2.1   | 61.7±2.2   | 61.6±2.8   | 0.853 | 0.591 |
| Head circumference, cm             | 34.9±1.4   | 34.8±1.2   | 35.1±1.3   | 0.604 | 38.1±1.2  | 37.7±1.1   | 38.1±1.3   | 0.096 | 39.9±1.1   | 39.8±1.1   | 39.9±1.2   | 0.914 | 0.234 |
| BMI, kg/m <sup>2</sup>             | 13.5±1.4   | 13.4±1.2   | 13.4±1.4   | 0.907 | 16.1±1.3  | 15.9±1.2   | 15.7±1.6   | 0.371 | 17.2±1.5   | 17.0±1.5   | 17.1±1.6   | 0.889 | 0.699 |
| z-scores <sup>1,2</sup>            |            |            |            |       |           |            |            |       |            |            |            |       |       |
| Weight-for age z-score             | 0.20±0.89  | 0.20±0.76  | 0.28±0.97  | 0.836 | 0.40±0.68 | 0.42±0.81  | 0.16±1.05  | 0.205 | 0.49±0.73  | 0.48±0.74  | 0.35±0.93  | 0.547 | 0.310 |
| Length-for-age z-score             | 0.31±1.11  | 0.36±1.10  | 0.52±1.25  | 0.562 | 0.42±0.98 | 0.57±1.04  | 0.45±1.07  | 0.720 | 0.46±0.96  | 0.54±1.08  | 0.34±1.23  | 0.627 | 0.246 |
| Weight-for-length z-score          | -0.35±1.20 | -0.40±1.15 | -0.42±1.20 | 0.951 | 0.15±1.08 | -0.00±1.07 | -0.07±1.08 | 0.546 | 0.28±1.03  | 0.22±1.02  | 0.22±1.26  | 0.940 | 0.832 |
| Head circumference-for-age z-score | 0.07±1.13  | -0.00±1.00 | 0.15±1.06  | 0.738 | 0.00±0.98 | -0.29±0.97 | -0.13±1.13 | 0.321 | -0.08±0.88 | -0.15±0.92 | -0.27±0.98 | 0.542 | 0.276 |
| BMI-for-age z-score                | 0.03±1.02  | -0.02±0.88 | -0.02±1.07 | 0.953 | 0.23±0.88 | 0.15±0.90  | 0.02±0.96  | 0.464 | 0.33±0.96  | 0.26±0.93  | 0.22±1.13  | 0.840 | 0.941 |

BF, breast-fed; IWP-F, Infant formula containing intact whey protein; HWP-F, Infant formula containing hydrolyzed whey protein; BMI, body mass index; SD, standard deviation; IQR, interquartile range. <sup>1</sup> Values are means ± SDs. <sup>2</sup> z-scores were calculated by using the World Health Organisation (WHO) growth standards. <sup>3</sup> The  $p$  values were derived from one-way analysis of variance (ANOVA) model tests for the difference between the three groups. <sup>4</sup> The  $p$  values represent the time × treatment interactions, derived from repeated measures ANOVAs.

**Table S3.** Gains in weight, length, and head circumference of study infants (Per protocol analyzed).

|                                         | Group     |           |           | <i>p</i> <sup>2</sup> | <i>p</i> <sup>3</sup> |
|-----------------------------------------|-----------|-----------|-----------|-----------------------|-----------------------|
|                                         | BF        | IWP-F     | HWP-F     |                       |                       |
| Weight, g/day <sup>1</sup>              |           |           |           |                       |                       |
| Baseline – 7 wk                         | 40.0±10.2 | 41.6±11.8 | 37.6±14.7 | 0.215                 | 0.085                 |
| Baseline – 13 wk                        | 34.4±6.5  | 35.1±7.3  | 34.1±8.6  | 0.787                 | 0.465                 |
| Crown-heel Length, cm/day <sup>1</sup>  |           |           |           |                       |                       |
| Baseline – 7 wk                         | 0.14±0.05 | 0.15±0.05 | 0.13±0.05 | 0.137                 | 0.157                 |
| Baseline – 13 wk                        | 0.12±0.02 | 0.12±0.03 | 0.12±0.03 | 0.287                 | 0.337                 |
| Head circumference, cm/day <sup>1</sup> |           |           |           |                       |                       |
| Baseline – 7 wk                         | 0.08±0.03 | 0.07±0.03 | 0.07±0.03 | 0.291                 | 0.224                 |
| Baseline – 13 wk                        | 0.06±0.01 | 0.06±0.02 | 0.06±0.02 | 0.629                 | 0.576                 |

BF, breast-fed; IWP-F, Infant formula containing intact whey protein; HWP-F, Infant formula containing hydrolyzed whey protein; <sup>1</sup> Values are means ± SDs; <sup>2</sup> The p values were derived from one-way analyses of variance; <sup>3</sup> The p values were derived from covariance analyses, adjusting for infant birth weight, gender, recruited center and growth indices at baseline.

**Table S4.** Feeding tolerance of study infants (Per protocol analyzed).

|                                                  | Group   |                      |                      | $p^2$ |
|--------------------------------------------------|---------|----------------------|----------------------|-------|
|                                                  | BF      | IWP-F                | HWP-F                |       |
| Number of daily feeding <sup>1</sup>             |         |                      |                      |       |
| 2wk                                              | 9.7±1.9 | 8.7±1.8 <sup>3</sup> | 8.6±1.8 <sup>3</sup> | 0.002 |
| 7wk                                              | 9.4±1.8 | 8.4±1.8 <sup>3</sup> | 8.4±1.6 <sup>3</sup> | 0.002 |
| 13wk                                             | 8.8±1.8 | 7.7±1.7 <sup>3</sup> | 7.8±1.7 <sup>3</sup> | 0.002 |
| Volume of formula intake, mL/kg/day <sup>1</sup> |         |                      |                      |       |
| 2wk                                              | N/A     | 127.9±49.2           | 134.7±53.4           | 0.470 |
| 7wk                                              | N/A     | 126.7±39.1           | 153.9±52.6           | 0.002 |
| 13wk                                             | N/A     | 116.4±35.6           | 141.3±39.9           | 0.001 |
| Number of daily crying <sup>1</sup>              |         |                      |                      |       |
| 2wk                                              | 1.3±2.2 | 1.2±2.1              | 1.1±1.7              | 0.950 |
| 7wk                                              | 0.9±1.9 | 1.3±2.2              | 1.0±1.8              | 0.441 |
| 13wk                                             | 0.4±1.2 | 0.8±1.9              | 0.7±1.5              | 0.385 |

BF, breastfeeding; IWP-F, Infant formula containing intact whey protein; HWP-F, Infant formula containing hydrolyzed whey protein; N/A, not available; <sup>1</sup> Values are expressed as means ± SDs; <sup>2</sup> *p* values were derived from ANOVAs for normally-distributed data, and chi-square tests or Fisher's exact tests for categorical data; <sup>3</sup> Pairwise comparison was done using the Bonferroni test, a significantly difference from the BF group was indicated by *p* < 0.05.

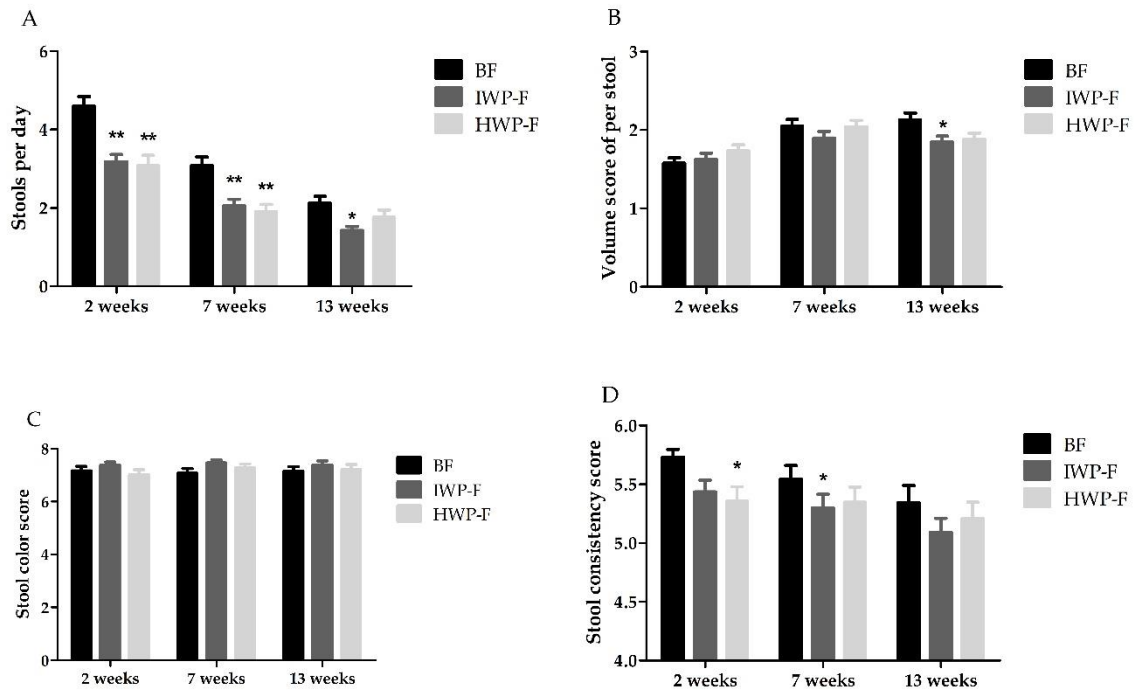

**Figure S2.** Stool characteristics (shown as mean and standard error) at 2, 7 and 13 weeks of age in breast-, IWP-F-, and HWP-F-fed term infants. (A) Stool frequency, indicated as stools per day. (B) Volume score per stool, expressed as stool diameter: 1  $\leq 7.5$  cm; 2  $> 7.5$  cm and  $< 13.0$  cm; 3  $\geq 13.0$  cm. (C) Stool color score, calculated using the Infants Stool Color Chart, 1 indicates the most abnormal stool score, and 9 is the most normal. (D) Stool consistency score, rated based on the simplified Bristol Stool Form Chart, 1 = hard lumps, 2 = sausage-shaped but lumpy, 3 = formed but with cracks, 4 = smooth and soft, 5 = soft blobs with clear-cut edges, 6 = mushy. Thus, the range of possible scores is 0–6; a higher score is closer to a softer stool. Significant differences compared with the BF group are indicated as follows: \*\*:  $p < 0.001$ ; \*:  $p < 0.05$ . HWP-F, Infant formula containing hydrolyzed whey protein; IWP-F, Infant formula containing intact whey protein; BF, breast-fed.

## References:

1. Von Berg A.; Koletzko S.; Grubl A.; Filipiak-Pittroff B.; Wichmann H.E.; Bauer C.P.; Reinhardt D.; Berdel D. The effect of hydrolyzed cow's milk formula for allergy prevention in the first year of life: the German Infant Nutritional Intervention Study, a randomized double-blind trial. *J. Allergy Clin. Immunol.* **2003**, *111*, 533-540. [\[CrossRef\]](#) [\[PubMed\]](#)
